# Supplementary material
Source: publisher figshare collection journal article supplement (https://gsajournals.figshare.com/articles/dataset/_/12814565)
Supplement: Supplementary file 1 [file 1]

Table S1: Primers used in this work. For SS primers, the 5' anchor sequence (brown), bridge sequence (blue), and 3' foot sequence (red) are indicated

| <i>eil-7</i>                                      | Allele | For / Rev | Figure                 | Bubble | Tm (°C) |
|---------------------------------------------------|--------|-----------|------------------------|--------|---------|
| GCTTGGATGGTGAAGAGC                                | wt     | Forward   | Fig.1C                 |        | 57      |
| GCTTGGATGGTGAAGAGT                                | mut    | Forward   | Fig.1C                 |        | 57      |
| CCAGATGACTTATTGAGCAAGCTGG                         | common | Reverse   | Fig.1C, 2D, 3C, 7D     |        | 61      |
| TCCTCCACCGGATCCG TAGCGAACCTACCA GAAGAGC           | wt     | Forward   | Fig.2D, 3C             | 14::14 | 61      |
| TCCTCCACCGGATCCG TAGCGAACCTACCA GAAGAGT           | mut    | Forward   | Fig.2D                 | 14::14 | 61      |
| CCGGATCCGATCGCTTG CTACCA GAAGAGC                  | wt     | Forward   | Fig.3C, 7D             | 6:6    | 60      |
| ACCGGATCCGATCGCT ACCTACCA GAAGAGC                 | wt     | Forward   | Fig.3C                 | 8:8    | 60      |
| GAACACAACAAGCAAATTGAATAG AACACT TTATGGG           | wt     | Reverse   | Fig.6C                 | 6:30   | 60      |
| GAACACAACAAGCAAATTGAATAG AACACT TTATGGGC          | wt     | Reverse   | Fig.6C                 | 6:30   | 60      |
| GAGATCGTTTTCTCTCGTTCTC                            | common | Forward   | Fig.6C                 |        | 56      |
| CCGGATCCGATCGCTTG CTACCA GAAGAGT                  | mut    | Forward   | Fig.7D                 | 6:6    | 60      |
| <b>C05B5.11</b>                                   |        |           |                        |        |         |
| AGAAACAAGGAGGAAACGATC                             | wt     | Reverse   | Fig.1F                 |        | 58      |
| AGAAACAAGGAGGAAACGATA                             | mut    | Reverse   | Fig.1F                 |        | 58      |
| CATGGTGCTCAACTGTG                                 | common | Forward   | Fig.1F, 2F, 3E, 4E     |        | 54      |
| GTCGATTGACTTGA AACCCCG TCTGTTCCTCCCT AACGATC      | wt     | Reverse   | Fig.2F, 3E             | 14::14 | 60      |
| GTCGATTGACTTGA AACCCCG TCTGTTCCTCCCT AACGATA      | mut    | Reverse   | Fig.2F                 | 14::14 | 60      |
| GACTTGA AACCCCG AGAACAAAG CTCCT AACGATC           | wt     | Reverse   | Fig.3E                 | 6:6    | 59      |
| TGACTTGA AACCCCG AGAACAA TCTCCT AACGATC           | wt     | Reverse   | Fig.3E                 | 8:8    | 60      |
| TTGAAACCCGAGAACAAAGGA CTCT AACGATC                | wt     | Reverse   | Fig.4E                 | 4:4    | 60      |
| <b>dof-7</b>                                      |        |           |                        |        |         |
| GTCAACAATGATTGGAAAGAGCGA ATAA CTCAGG              | wt     | Forward   | Fig.4B, 5B             | 4:4    | 59      |
| GACGTCAACAATGATTGG CTCTAA CTCAGG                  | wt     | Forward   | Fig.4B                 | 6:6    | 52      |
| GACGAAGATACCTTGGATC                               | common | Reverse   | Fig.4B, 5B             |        | 53      |
| GTCAACAATGATTGGAAAGAGCGA ATAA CTCAAG              | wt     | Forward   | Fig.5B                 | 4:4    | 59      |
| GTCAACAATGATTGGAAAGAGCGA ATAA CTCAGGC             | wt     | Forward   | Fig.5B                 | 4:4    | 59      |
| AATTGATCTGTGAGTGTGGCCTG TTCGTC ACGATACC           | wt     | Reverse   | Fig.6D                 | 6:51   | 60      |
| AGCCATGTTACATGGCATCTTCACTC                        | common | Forward   | Fig.6D                 |        | 63      |
| <b>eat-2</b>                                      |        |           |                        |        |         |
| TATTACTACGTTGCAAATTCCTCAT CCAT CACTATG            | wt     | Reverse   | Fig.4C, 5C             | 4:4    | 57      |
| GTAATATTACTACGTTGCAAATTCCTCAT TACCAT CACTATG      | wt     | Reverse   | Fig.4C                 | 6:6    | 56      |
| GTAGTGCACACTATAGAGGTAAGT                          | common | Forward   | Fig.4C, 5C             |        | 57      |
| TATTACTACGTTGCAAATTCCTCAT CCAT CACTACG            | wt     | Reverse   | Fig.5C                 | 4:4    | 57      |
| TATTACTACGTTGCAAATTCCTCAT CCAT CACTATGA           | wt     | Reverse   | Fig.5C                 | 4:4    | 57      |
| GCTCATTGCACTGTTGAATAACA CTATAGC GGTITTC           | wt     | Forward   | Fig.7C                 | 8:8    | 59      |
| GCTCATTGCACTGTTGAATAACA CTATAGC GGTITCT           | mut    | Forward   | Fig.7C                 | 8:8    | 59      |
| GTTACTTAAGCGTACGAGCC                              | common | Reverse   | Fig.7C                 |        | 59      |
| <b>him-5</b>                                      |        |           |                        |        |         |
| CTTCCGGAGCTTTGCC                                  | wt     | Reverse   | Fig.1A                 |        | 58      |
| CTTCCGGAGCTTTGCT                                  | mut    | Reverse   | Fig.1A                 |        | 58      |
| GTCGTTACAGAACAGAAATACATCG                         | common | Forward   | Fig.1A                 |        | 59      |
| <b>klp-6</b>                                      |        |           |                        |        |         |
| CATCAATCAAATACGCCAACTTTG                          | wt     | Reverse   | Fig.1A                 |        | 56      |
| CATCAATCAAATACGCCAACTTTA                          | mut    | Reverse   | Fig.1A                 |        | 56      |
| GCATGTGGTAGGCAGTTG                                | common | Forward   | Figs. 1-3, 5-7         |        | 60      |
| GATTGAAAAGTGTCTCCACATC TTAGTTTATGCGGT AACITTTG    | wt     | Reverse   | Fig.2G, 3B             | 14::14 | 59      |
| GATTGAAAAGTGTCTCCACATC TTAGTTTATGCGGT AACITTTA    | mut    | Reverse   | Fig.2G, 3A             | 14::14 | 59      |
| GATTGAAAAGTGTCTCCACATC TTAGTTTATGCGGT AACITTTAC   | mut    | Reverse   | Fig.2G                 | 14::14 | 59      |
| GAAAAGTGTCTCCACATCAAAT TGCGGT AACITTTG            | wt     | Reverse   | Fig.3B, 5B             | 6:6    | 56      |
| GAAAAGTGTCTCCACATCAAAT TGCGGT AACITTTG            | wt     | Reverse   | Fig.3B                 | 8:8    | 58      |
| GAAAAGTGTCTCCACATCAAAT TGCGGT AACITTTA            | mut    | Reverse   | Fig.3A                 | 6:6    | 56      |
| GAAAAGTGTCTCCACATCAAAT TGCGGT AACITTTA            | mut    | Reverse   | Fig.3A                 | 8:8    | 58      |
| GAAAAGTGTCTCCACATCAAAT TGCGGT ACTTTG              | wt     | Reverse   | Fig. 5A                | 6:6    | 58      |
| AAAAGTGTCTCCACATCAAATAC CGGTTT CTITG              | wt     | Reverse   | Fig.5A                 | 6:6    | 58      |
| ITGTTCTCCACATCAAATACG GGTITG TITG                 | wt     | Reverse   | Fig.5A                 | 6:6    | 58      |
| GAAAAGTGTCTCCACATCAAAT TGCGGT AACITTTG            | wt     | Reverse   | Fig.5B                 | 6:6    | 56      |
| GAAAAGTGTCTCCACATCAAAT TGCGGT AACITTTG            | wt     | Reverse   | Fig.5B, 7B             | 6:6    | 56      |
| CCTGATAAATCAACGATTGGAAACTGTT AAGGGT AACITTTG      | wt     | Reverse   | Fig.6B                 | 6:24   | 58      |
| CCTGATAAATCAACGATTGGAAACTGTT AAGGGT AACITTTG      | wt     | Reverse   | Fig.6B                 | 6:24   | 58      |
| GAAAAGTGTCTCCACATCAAAT TGCGGT AACITTTA            | mut    | Reverse   | Fig.7B                 | 6:6    | 56      |
| <b>lev-11</b>                                     |        |           |                        |        |         |
| TACACAGAAAAGAAATCGGACCTC                          | wt     | Forward   | Fig.1B                 |        | 57      |
| TACACAGAAAAGAAATCGGACCTT                          | mut    | Forward   | Fig.1B                 |        | 57      |
| CTGTATACATCAGCTGCAGC                              | common | Reverse   | Fig.1B, 2C, 4F, 6A, 7E |        | 57      |
| GATAGTGAAGACACAGAAAGACTACTA GTGTCTCTCTTAG GGACCTC | wt     | Forward   | Fig.2C                 | 14::14 | 56      |
| GATAGTGAAGACACAGAAAGACTACTA GTGTCTCTCTTAG GGACCTT | mut    | Forward   | Fig.2C                 | 14::14 | 56      |
| ATCCGACCGTCTCATC GTCT CTGAAGG                     | wt     | Reverse   | Fig.4A                 | 4:4    | 59      |
| AGATCCGACCGTCTCA AGGTCT CTGAAGG                   | wt     | Reverse   | Fig.4A                 | 6:6    | 60      |
| CATCTCACACAGCAAGTG                                | common | Forward   | Fig.4A                 |        | 54      |
| AAGACACAGAAAAGAAAGACTACTACACAGAAAAG TTAG GGACCTC  | wt     | Forward   | Fig.4F                 | 4:4    | 59      |
| GTGAAGACACAGAAAAGACTACTACACA TCTCATGA GGACCTC     | wt     | Forward   | Fig.7E                 | 8:8    | 59      |
| GTGAAGACACAGAAAAGACTACTACACA TCTCATGA GGACCTT     | mut    | Forward   | Fig.7E                 | 8:8    | 59      |
| TCACTTTGATAGTGAAGACACAGA TTCTAGG GGACCTC          | wt     | Forward   | Fig.6A                 | 6:24   | 56      |
| <b>plx-2</b>                                      |        |           |                        |        |         |
| TGCCGTGTACTCAACTCTTCT                             | wt     | Forward   | Fig.1E                 |        | 58      |
| TGCCGTGTACTCAACTCTTCA                             | mut    | Forward   | Fig.1E                 |        | 58      |
| GTAGTGTTCATGTGGATCAC                              | common | Reverse   | Fig.1E, 2E, 3D, 4D     |        | 54      |
| CCATGTGAAAACCCACAGGTTG GGCACATATGATTT CTCTTCT     | wt     | Forward   | Fig.2E, 3D             | 14::14 | 60      |
| CCATGTGAAAACCCACAGGTTG GGCACATATGATTT CTCTTCA     | mut    | Forward   | Fig. 2E                | 14::14 | 60      |
| CCCACAGGTTGCCGTGTAT TGAGTT CTCTTCT                | wt     | Forward   | Fig.3D                 | 6:6    | 62      |
| CCCACAGGTTGCCGTGTAT TGAGTT CTCTTCT                | wt     | Forward   | Fig.3D                 | 8:8    | 62      |
| CCCACAGGTTGCCGTGTATAC AGTT CTCTTCT                | ww     | Forward   | Fig.4D                 | 4:4    | 60      |
