# Supplementary material
Source: publisher figshare collection journal article supplement (https://gsajournals.figshare.com/articles/dataset/_/12814565)
Supplement: Supplementary file 2 [file 1]

**Figure S1**

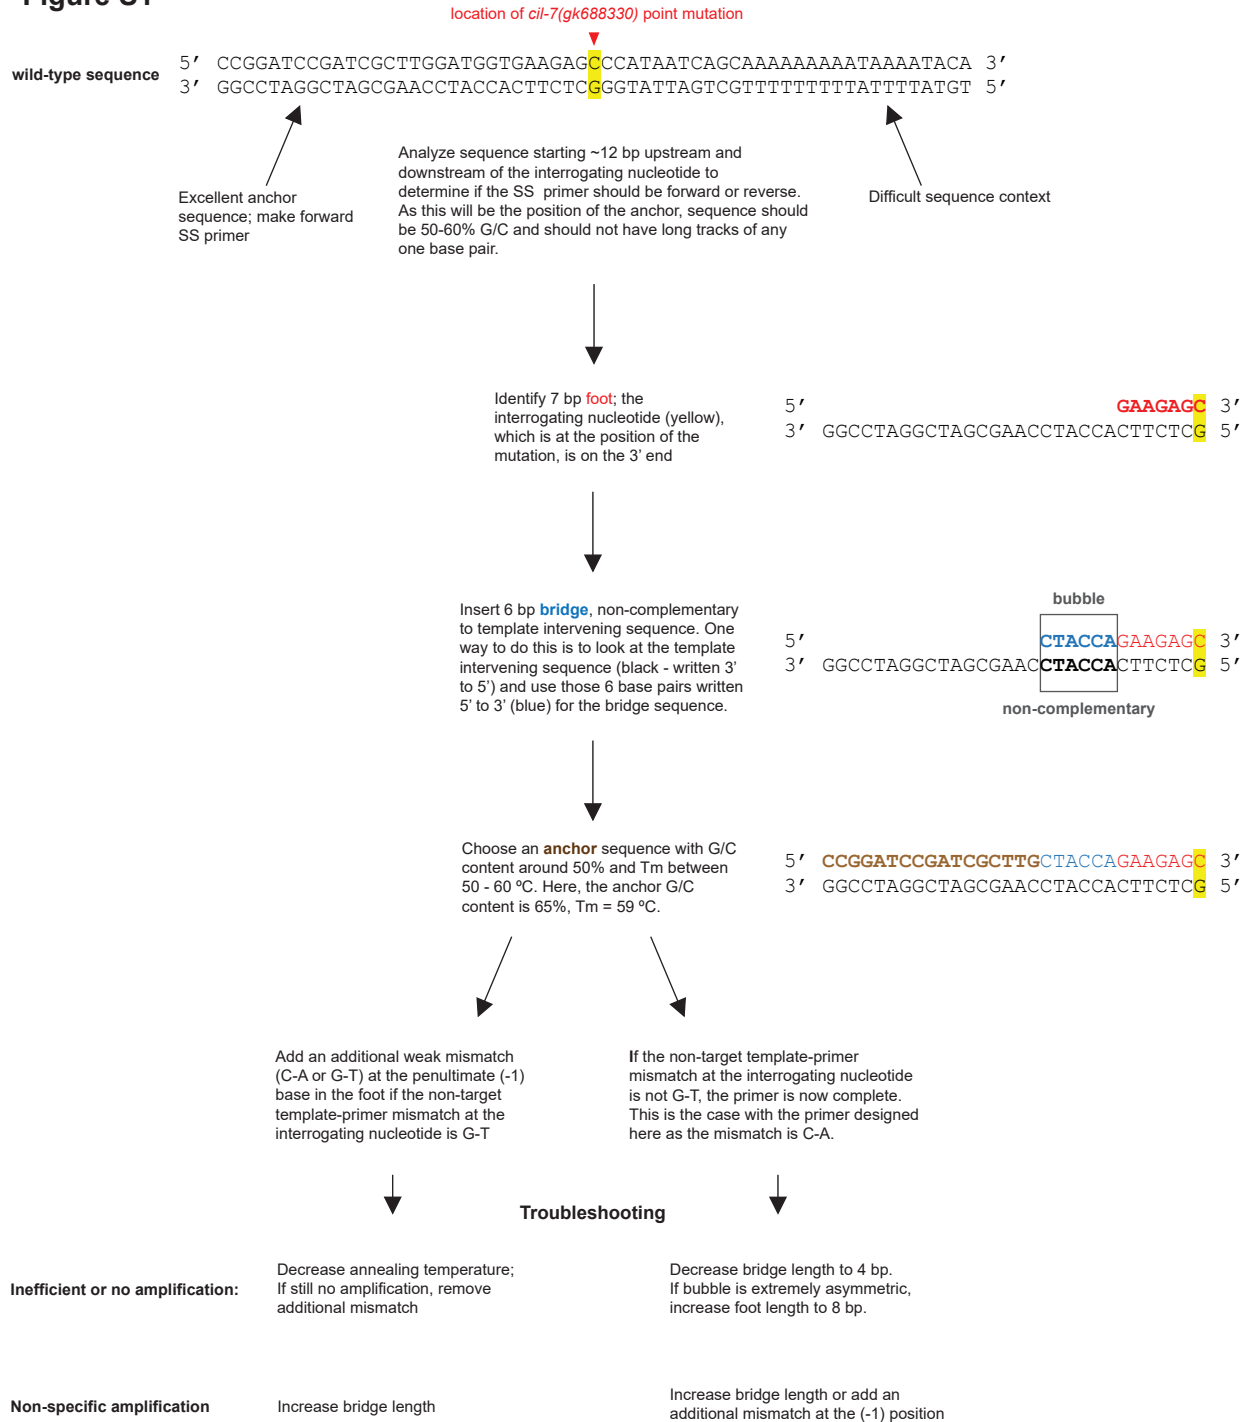

**Figure S1.** Detailed guidelines for SS primer design. As an example, we show how the SS primer used to amplify wild type, but not *cil-7(gk688330)*, was designed. The template DNA (black) as well as the interrogating nucleotide (yellow highlight), foot sequence (red), bridge sequence (blue), and anchor sequence (brown) of the primer are indicated. A non-complementary bubble (grey box) is formed by the bridge and template intervening sequence. The SS primer to detect the *cil-7(gk688330)* allele is the same as the wild-type primer except there is a T (instead of a C) at the interrogating nucleotide.
